# Supplementary material
Source: PubMed Central journal article supplement (PMC1578261)
Supplement: rsif20040020s01.pdf [file rsif20040020s01.pdf]

# **ELECTRONIC APPENDIX**

This is the Electronic Appendix to the article

**Roles of discontinuities in bio-inspired adhesive pads**

by

**Jun Young Chung and Manoj K. Chaudhury**

*J. R. Soc. Interface* (doi:10.1098/rsif.2004.0020)

Electronic appendices are refereed with the text; however, no attempt is made to impose a uniform editorial style on the electronic appendices.

The movie files show the following:

Movie 1: opening edge crack

Movie 2: closing edge crack

Movie 3: crack opening on lateral incisions

Movie 4: crack closing on lateral incisions

Movie 5: crack opening on longitudinal incisions

Movie 6: crack closing on longitudinal incisions

Movie 7: crack opening on crosswise incisions

Movie 8: crack closing on crosswise incisions
